# Supplementary material
Source: publisher figshare collection journal article supplement (https://gsajournals.figshare.com/ndownloader/files/18219158)
Supplement: Supplementary file 1 [file 18219158]

| **Table S1. Tissues of eight three-year-old parr chosen for the Atlantic salmon mRNA expression study.** | | | | | | | | | | | | | | | | | | |
| --- | --- | --- | --- | --- | --- | --- | --- | --- | --- | --- | --- | --- | --- | --- | --- | --- | --- | --- |
| **Fish ID** | **Sex** | **Habitat** | **Maturity stage** | **Tissue** | | | | | | | | | | | | | | |
|  |  |  |  | **Adipose** | **Brain** | **Eye** | **Fin (adipose)** | **Fin (tail)** | **Gill** | **Heart** | **Kidney** | **Liver** | **Muscle** | **Ovary** | **Pyloric caeca** | **Skin** | **Spleen** | **Testis** |
| N.1 | Male | Hatchery | Immature | x | x | x | x | x | x | x | x | x | x |  | x | x | x |  |
| N.2 | Male | Hatchery | Immature | x | x | x |  |  | x | x | x | x |  |  | x |  |  |  |
| N.3 | Female | Hatchery | Immature | x | x | x |  |  | x | x | x | x | x | x | x | x | x | x |
| N.4 | Female | Hatchery | Immature | x | x | x |  |  | x |  | x | x | x* | x | x | x | x | x |
| I.1 | Male | Wild | Immature |  |  | x |  |  | x | x | x | x* | x |  |  |  |  |  |
| I.2 | Male | Wild | Immature |  |  | x |  |  | x | x | x | x | x |  |  | x |  |  |
| I.3 | Male | Wild | Mature |  |  | x |  |  | x | x | x | x | x |  |  | x |  | x |
| I.4 | Male | Wild | Mature |  |  | x |  |  |  | x | x | x | x |  |  | x |  | x |
| N = Neva, I = Inarijoki  * Samples were excluded from the data due to not passing the quality control during data analysis | | | | | | | | | | | | | | | | | | |
